# Supplementary figures and images for: Rapid determination of farinograph parameters of wheat flour using data fusion and a forward interval variable selection algorithm
Source: Royal Society of Chemistry journal article supplement (doi:10.1039/c7ay02065a), 2017-01-01

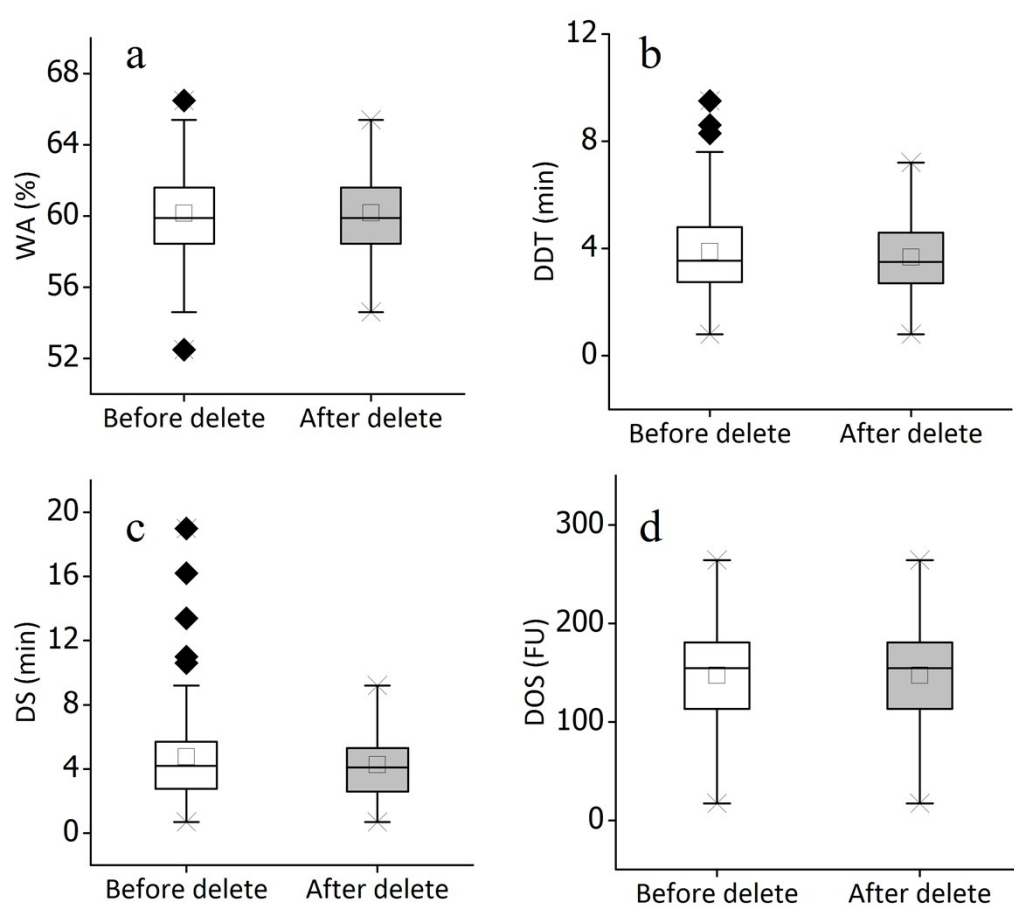

**Supplementary material 3.** Box plot of WA (a), DDT(b), DS (c) and DOS (d) before and after outlier (◆) deletion

Supplement: c7ay02065a3.pdf [file c7ay02065a3.pdf]

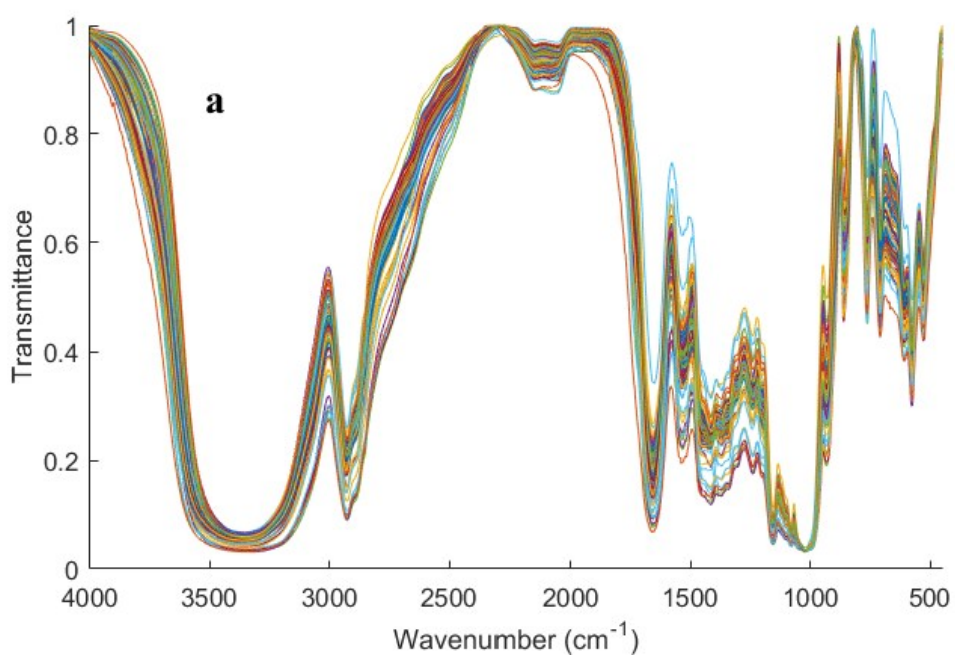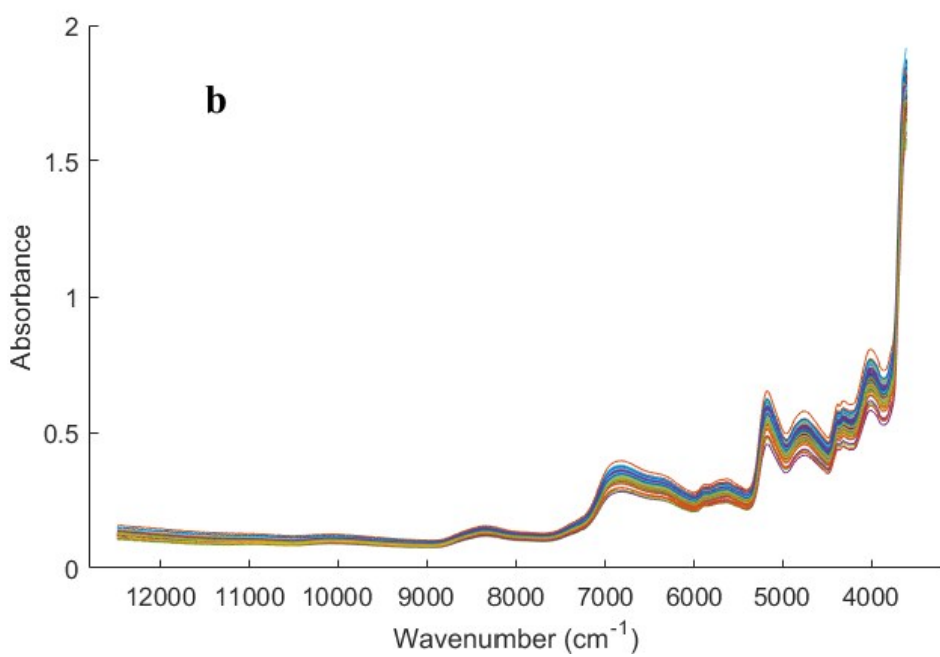

**Supplementary material 4.** MIR (a) and NIR (b) spectra of wheat flour samples

Supplement: c7ay02065a4.pdf [file c7ay02065a4.pdf]
